# Supplementary material for: Staying Active with Multimorbidity In Acute hospital settings (StAMInA) trial: protocol for a feasibility randomised controlled trial of allied health assistant mobility rehabilitation for patients with multimorbidity
Source: HighWire-hosted journal article supplement (doi:10.1136/bmjopen-2023-078843), 2024-01-01
Supplement: bmjopen-2023-078843supp005_data_supplement.pdf [file bmjopen-2023-078843supp005_data_supplement.pdf]

Supplementary File 5. Description of education provided to allied health assistants according to the template for intervention description and replication (TIDieR)

| Description of education provided to allied health assistants |                                                                                                                                                                                                                                                                                                                                                                                                                                                                                                                                                                                                                                                                                                                                                                                                                |
|---------------------------------------------------------------|----------------------------------------------------------------------------------------------------------------------------------------------------------------------------------------------------------------------------------------------------------------------------------------------------------------------------------------------------------------------------------------------------------------------------------------------------------------------------------------------------------------------------------------------------------------------------------------------------------------------------------------------------------------------------------------------------------------------------------------------------------------------------------------------------------------|
| Brief name                                                    | Education on the physiotherapy management of people with medical multimorbidity                                                                                                                                                                                                                                                                                                                                                                                                                                                                                                                                                                                                                                                                                                                                |
| Why                                                           | To prepare allied health assistants for providing mobility rehabilitation to people with medical multimorbidity                                                                                                                                                                                                                                                                                                                                                                                                                                                                                                                                                                                                                                                                                                |
| What materials                                                | Patient medical records; patient imaging (e.g., x-rays); blood pressure machine and pulse oximeter; gait aids; hoists and other assistive transfer equipment; patient seating; wheelchairs; IV poles; hospital bed                                                                                                                                                                                                                                                                                                                                                                                                                                                                                                                                                                                             |
| What procedures                                               | <div>Education provided on the following topics:</div> <ul style="list-style-type: none"><li>• Clinical deterioration – recognition, assessment, and management of patient clinical deterioration</li><li>• Mobility rehabilitation, manual handling and environment management – Administering and supervising functional strengthening/skills-based exercise, safe transferring of patients, appropriate use and prescription of gait aids, preparation of the environment and falls prevention strategies</li><li>• Pathophysiology of medical conditions and their implications for mobility rehabilitation, including but not limited to: cardiovascular disease; diabetes; kidney disease; respiratory disease; liver disease; cancer; obesity; mental health conditions; cognitive impairment</li></ul> |
| Who provided                                                  | A physiotherapist with at least 5 years of work experience in general medicine.                                                                                                                                                                                                                                                                                                                                                                                                                                                                                                                                                                                                                                                                                                                                |
| How provided                                                  | Face-to-face                                                                                                                                                                                                                                                                                                                                                                                                                                                                                                                                                                                                                                                                                                                                                                                                   |
| Where (setting)                                               | Medical ward, acute hospital                                                                                                                                                                                                                                                                                                                                                                                                                                                                                                                                                                                                                                                                                                                                                                                   |
| When/how much (dose)                                          | <ul style="list-style-type: none"><li>• Clinical deterioration – 60-minute tutorial and clinical exposure (with patients) over a 2-week period working alongside the cardiorespiratory physiotherapist.</li><li>• Manual handling and environment management – Clinical exposure (with patients) over a 2-week period working alongside the physiotherapist.</li><li>• Medical condition education – 3 x 30-minute tutorials</li><li>• Approximately 6 hours of education (tutorial and clinical)</li></ul>                                                                                                                                                                                                                                                                                                    |
| Tailoring                                                     | The education provided specific to a medical ward environment and acute medical patients.                                                                                                                                                                                                                                                                                                                                                                                                                                                                                                                                                                                                                                                                                                                      |
| Fidelity checking measures                                    | Attendance at education sessions recorded by the physiotherapist                                                                                                                                                                                                                                                                                                                                                                                                                                                                                                                                                                                                                                                                                                                                               |
